# Supplementary material
Source: Springer Nature journal article supplement (https://www.springermedizin.de/resource/supplementary/12889_2010_3241_MOESM1_ESM.pdf/9488258)
Supplement: MOESM1 [file 9488258]

RCT ID = Reference number in bibliography

OA = exclusion protocols for RCTs involving patients with osteoarthritis

RA = exclusion protocols for RCTs involving patients with rheumatoid arthritis

| RCT ID | Number of patients | Age range of patients | Mean age of patients | Duration of clinical trial | Breakdown of cardiovascular exclusions |                              |                                         |                                       |                                         | Breakdown of CVA exclusions |                                                  |                                       |
|--------|--------------------|-----------------------|----------------------|----------------------------|----------------------------------------|------------------------------|-----------------------------------------|---------------------------------------|-----------------------------------------|-----------------------------|--------------------------------------------------|---------------------------------------|
|        |                    |                       |                      |                            | Cardiovascular exclusions              | Class III / IV angina or CHF | Controlled or uncontrolled hypertension | Past or present anticoagulant therapy | Myocardial infarction / coronary bypass | Cerebrovascular exclusions  | History of stroke or stroke within 2 years prior | CVA event or TIA within 2 years prior |
| Ref 24 | 784                | ≥ 40 years            | 63 years             | 52 weeks                   | ✓                                      | ✓                            | ✓                                       | ✓                                     | ✓                                       | ✓                           | ✓                                                | ✓                                     |
| Ref 26 | 809                | ≥ 40 years            | 64 years             | 6 weeks                    | ✓                                      | ✓                            | ✓                                       |                                       | 1 year prior                            | ✓                           | ✓                                                | ✓                                     |
| Ref 27 | 219                | ≥ 40 years            | 64 years             | 6 weeks                    | ✓                                      |                              |                                         | ✓                                     |                                         | ✓                           | ✓                                                | ✓                                     |
| Ref 28 | 672                | 38 - 92 yrs           | 62 years             | 6 weeks                    | ✓                                      | ✓                            | ✓                                       |                                       |                                         | ✓                           | ✓                                                | ✓                                     |
| Ref 29 | 775                | 50 - 89 yrs           | 62 years             | 26 weeks                   | ✓                                      |                              |                                         | ✓                                     |                                         | ✓                           |                                                  | ✓                                     |
| Ref 30 | 742                | 47 - 87 yrs           | 62 years             | 26 weeks                   | ✓                                      |                              |                                         | ✓                                     |                                         | ✓                           |                                                  | ✓                                     |
| Ref 33 | 736                | 39 - 91 yrs           | 62 years             | 6 weeks                    | ✓                                      | ✓                            | ✓                                       | ✓                                     |                                         | ✓                           | ✓                                                | ✓                                     |
| Ref 34 | 693                | 38 - 85 yrs           | 62 years             | 52 weeks                   | ✓                                      | ✓                            | ✓                                       | ✓                                     |                                         | ✓                           | ✓                                                | ✓                                     |
| Ref 36 | 341                | 80 - 95 yrs           | 83 years             | 6 weeks                    | ✓                                      | ✓                            | ✓                                       |                                       |                                         |                             |                                                  |                                       |
| RA     |                    |                       |                      |                            |                                        |                              |                                         |                                       |                                         |                             |                                                  |                                       |
| Ref 23 | 8076               | ≥ 40 years            | 58 years             | 32 wks (mean)              | ✓                                      |                              |                                         | ✓                                     | ✓                                       | ✓                           |                                                  | ✓                                     |
| Ref 35 | 658                | 24 - 86 yrs           | 55 years             | 8 weeks                    | ✓                                      |                              |                                         |                                       | ✓                                       |                             |                                                  |                                       |

Protocols for the 7-day safety trial (Ref 32), the 2-week safety trial (Ref 25) and the pooled trial (Ref 31) are not included. The 9 RCTs in the pooled trial include 8 of the efficacy studies above.

| RCT ID | Renal                   | GI                         | Hepatic          | Neoplastic              |
|--------|-------------------------|----------------------------|------------------|-------------------------|
|        | exclusions              | exclusions                 | exclusions       | exclusions              |
| OA     | Creatinine clearance    | Active or recent GI        | Active or recent | Recent neoplastic event |
| Ref 24 | ≤ 30 ml/min (severe RI) | ulceration, bleed, surgery | hepatic disease  | ✓                       |
| Ref 26 | ✓                       |                            | ✓                | ✓                       |
| Ref 27 | ≤ 40 ml/min             | ✓                          | ✓                | ✓                       |
| Ref 28 | ✓                       | ✓                          | ✓                | ✓                       |
| Ref 29 | ✓                       | ✓                          | ✓                | ✓                       |
| Ref 30 | ✓                       | ✓                          | ✓                | ✓                       |
| Ref 33 | ✓                       | ✓                          | ✓                | ✓                       |
| Ref 34 | ✓                       | ✓                          | ✓                | ✓                       |
| Ref 36 | ✓                       | ✓                          | ✓                | ✓                       |
| RA     |                         |                            |                  |                         |
| Ref 23 | ✓                       | ✓                          | ✓                | ✓                       |
| Ref 35 | ✓                       | ✓                          | ✓                | ✓                       |
